# Supplementary material for: MLVA Subtyping of Genovar E Chlamydia trachomatis Individualizes the Swedish Variant and Anorectal Isolates from Men who Have Sex with Men
Source: PLoS One. 2012 Feb 21;7(2):e31538. doi: 10.1371/journal.pone.0031538 (PMC3283677; doi:10.1371/journal.pone.0031538)
Supplement: Table S1 — Characteristics of the 146 C. trachomatis genovar E isolates and the 74 positive specimens used in this study. aIsolates and positive specimens are preceded by the letters IE and SE, respectively. Specimens corresponding to isolates are indicated in parentheses. bFor the French isolates and specimens, the city is specified before the country. cIsolates in bold were also typed by ompA sequencing, MLST and MLVA-3. dIsolates and specimen belonging to the group II and the group III. (DOC) [file pone.0031538.s001.doc]

Table S1.

| **Isolate or specimen**a | **Sexe** | **Origin** | | **Date of isolation** | **MLVA-5 type** |
| --- | --- | --- | --- | --- | --- |
| **Country**b | **Source** |
| ***Group I: urogenital clincial isolates and corresponding specimens when they were studied*** | | | | | |
| **IErefE/Bour**c |  |  |  |  | 02 |
| **IE39** | M | Bordeaux, France | urethra | 08/12/1987 | 02 |
| **IE42** | M | Bordeaux, France | urethra | 18/11/1988 | 21 |
| IE56 | M | Bordeaux, France | urethra | 24/07/1984 | 02 |
| IE77 | F | Bordeaux, France | cervix | 31/03/1990 | 02 |
| IE121 | F | Bordeaux, France | peritoneal fluid | 25/10/1990 | 11 |
| IE128 | F | Bordeaux, France | intrauterine device | 29/11/1990 | 19 |
| IE174 | F | Bordeaux, France | cervix | 12/03/1991 | 11 |
| IE214 | F | Bordeaux, France | cervix | 16/09/1991 | 11 |
| **IE248** | M | Bordeaux, France | urethra | 09/01/1992 | 02 |
| IE266 | F | Bordeaux, France | cervix | 20/03/1992 | 02 |
| IE286 | F | Bordeaux, France | cervix | 12/05/1992 | 02 |
| IE296 | M | Bordeaux, France | urethra | 27/05/1992 | 11 |
| IE310 | F | Bordeaux, France | peritoneal fluid | 07/07/1992 | 02 |
| **IE315** | M | Bordeaux, France | urethra | 12/08/1992 | 22 |
| **IE316** | F | Bordeaux, France | cervix | 13/08/1992 | 22 |
| IE361 | F | Bordeaux, France | cervix | 11/01/1993 | 13 |
| **IE362** | F | Bordeaux, France | urethra | 15/01/1993 | 16 |
| IE367 | F | Bordeaux, France | cervix | 29/01/1993 | 06 |
| **IE374** | F | Bordeaux, France | cervix | 10/03/1993 | 10 |
| IE375 | F | Bordeaux, France | cervix | 04/11/1992 | 02 |
| IE377 | F | Bordeaux, France | cervix | 25/01/1993 | 13 |
| IE378 | F | Bordeaux, France | cervix | 17/02/1993 | 11 |
| IE385 | M | Bordeaux, France | urethra | 12/02/1993 | 13 |
| **IE386** | F | Bordeaux, France | cervix | 11/11/1992 | 11 |
| IE391 | F | Bordeaux, France | cervix | 26/11/1992 | 02 |
| IE395 | M | Bordeaux, France | urethra | 08/06/1993 | 11 |
| IE397 | F | Bordeaux, France | cervix | 26/05/1993 | 11 |
| IE400 | F | Bordeaux, France | cervix | 19/05/1993 | 11 |
| IE405 | F | Bordeaux, France | cervix | 05/06/1993 | 13 |
| IE409 | M | Bordeaux, France | urethra | 12/08/1993 | 01 |
| IE413 | M | Bordeaux, France | urethra | 29/09/1993 | 13 |
| IE427 | F | Bordeaux, France | cervix | 05/10/1993 | 02 |
| IE437 | F | Bordeaux, France | cervix | 18/11/1993 | 06 |
| IE442 | F | Bordeaux, France | cervix | 11/08/1993 | 11 |
| IE454 | M | Bordeaux, France | urethra | 09/03/1994 | 13 |
| IE457 | F | Bordeaux, France | cervix | 10/03/1994 | 11 |
| IE461 | F | Bordeaux, France | cervix | 04/01/1994 | 13 |
| **IE466** | F | Bordeaux, France | cervix | 03/01/1994 | 18 |
| IE469 | F | Bordeaux, France | cervix | 10/12/1993 | 13 |
| IE472 | F | Bordeaux, France | cervix | 08/04/1994 | 13 |
| IE474 | F | Bordeaux, France | peritoneal fluid | 19/04/1994 | 11 |
| IE479 | M | Bordeaux, France | urethra | 24/05/1994 | 11 |
| IE489 | F | Bordeaux, France | cervix | 10/04/1994 | 11 |
| IE499 | F | Bordeaux, France | cervix | 17/06/1994 | 11 |
| IE504 | F | Bordeaux, France | cervix | 19/07/1994 | 13 |
| **IE534** | F | Bordeaux, France | cervix | 30/08/1994 | 19 |
| IE535 | F | Bordeaux, France | cervix | 03/12/1994 | 11 |
| IE542 | F | Bordeaux, France | cervix | 12/04/1994 | 13 |
| IE555 | F | Bordeaux, France | cervix | 10/02/1995 | 11 |
| IE570 | M | Bordeaux, France | urethra | 02/03/1995 | 13 |
| IE574 | M | Bordeaux, France | urethra | 25/07/1995 | 02 |
| IE585 | F | Bordeaux, France | cervix | 23/09/1995 | 19 |
| **IE629** | F | Bordeaux, France | cervix | 10/01/1996 | 13 |
| IE632 | F | Bordeaux, France | cervix | 20/02/1996 | 11 |
| IE637 | F | Bordeaux, France | cervix | 27/05/1996 | 13 |
| **IE638** | F | Bordeaux, France | peritoneal fluid | 04/06/1996 | 04 |
| IE651 | F | Bordeaux, France | ovary | 12/06/1996 | 01 |
| IE652 | F | Bordeaux, France | cervix | 16/06/1996 | 05 |
| **IE662** | F | Bordeaux, France | cervix | 05/03/1997 | 10 |
| **IE663** | F | Bordeaux, France | cervix | 14/03/1997 | 13 |
| **IE665** | F | Bordeaux, France | cervix | 27/03/1997 | 17 |
| **IE774** | M | Bordeaux, France | urethra | 18/11/2002 | 09 |
| IE780 | F | Bordeaux, France | cervix | 09/03/2003 | 13 |
| **IE783** | M | Bordeaux, France | urethra | 09/04/2003 | 02 |
| IE798 | F | Bordeaux, France | cervix | 02/08/2004 | 11 |
| **IE802** (SE10163) | F | Bordeaux, France | cervix | 24/09/2004 | 13 |
| IE809 | F | Bordeaux, France | cervix | 11/11/2004 | 11 |
| IE811 | F | Bordeaux, France | cervix | 09/12/2004 | 19 |
| IE823 | F | Bordeaux, France | cervix | 11/05/2005 | 11 |
| **IE828** | F | Bordeaux, France | peritoneal fluid | 07/06/2005 | 11 |
| IE842 | F | Bordeaux, France | cervix | 16/03/2006 | 11 |
| IE856 (SE13096) | M | Bordeaux, France | urethra | 15/09/2006 | 13 |
| IE857 | F | Bordeaux, France | cervix | 20/09/2006 | 05 |
| **IE858** (SE13203) | F | Bordeaux, France | cervix | 29/09/2006 | 10 |
| **IE864** (SE13737) | F | Bordeaux, France | cervix | 11/12/2006 | 13 |
| IE870 | F | Bordeaux, France | cervix | 27/03/2007 | 13 |
| IE879 | F | Bordeaux, France | cervix | 23/04/2007 | 13 |
| IE882 | F | Bordeaux, France | cervix | 01/06/2007 | 11 |
| IE886 | F | Bordeaux, France | cervix | 25/06/2007 | 13 |
| IE887 | F | Bordeaux, France | cervix | 02/07/2007 | 05 |
| IE897 | M | Bordeaux, France | urethra | 29/10/2007 | 02 |
| IE900 (SE16493) | F | Bordeaux, France | cervix | 14/11/2007 | 02 |
| **IE901** | F | Bordeaux, France | cervix | 29/11/2007 | 09 |
| IE902 | F | Bordeaux, France | cervix | 02/12/2007 | 20 |
| IE910 (SE16877) | F | Bordeaux, France | cervix | 06/01/2008 | 02 |
| IE919 (SE17349) | F | Bordeaux, France | cervix | 20/02/2008 | 02 |
| IE921 (SE17350) | F | Bordeaux, France | cervix | 20/02/2008 | 08 |
| IE924 | F | Bordeaux, France | cervix | 23/03/2008 | 02 |
| IE925 | F | Bordeaux, France | cervix | 27/03/2008 | 02 |
| IE926 | F | Bordeaux, France | cervix | 01/04/2008 | 13 |
| IE929 | F | Bordeaux, France | cervix | 09/05/2008 | 07 |
| IE932 | M | Bordeaux, France | urethra | 04/06/2008 | 02 |
| IE948 | F | Bordeaux, France | cervix | 05/11/2008 | 11 |
| IE949 | M | Bordeaux, France | urethra | 18/11/2008 | 02 |
| IE952 | M | Bordeaux, France | urethra | 10/12/2008 | 02 |
| **IE957** | M | Bordeaux, France | bronchial aspiration | 19/01/2009 | 02 |
| IE963 (SE20643) | F | Bordeaux, France | cervix | 21/03/2009 | 08 |
| IE969 | F | Bordeaux, France | cervix | 11/05/2009 | 13 |
| IE973 (SE21369) | F | Bordeaux, France | cervix | 03/06/2009 | 13 |
| IE980 (SE21712) | F | Bordeaux, France | cervix | 14/07/2008 | 13 |
| IE984 | F | Bordeaux, France | cervix | 29/07/2009 | 13 |
| IE985 (SE21892) | F | Bordeaux, France | cervix | 02/08/2009 | 02 |
| ***Group II: concomitant urogenital isolates and specimens*** | | | | | |
| IE239d, **IE240** | F | Bordeaux, France | cervix, cervix | 13/12/1991 | 13 |
| IE263, IE264, IE265 | F | Bordeaux, France | endometrium, cervix, cervix | 16/03/1992 | 02 |
| **IE357d**, **IE358**,  IE359 | F | Bordeaux, France | cervix, peritoneal fluid, endometrium | 28/12/1992 | 02 |
| **IE392**, IE393 | F | Bordeaux, France | cervix, peritoneal fluid | 24/04/1993 | 15 |
| IE547, IE548 | F | Bordeaux, France | cervix, urethra | 10/05/1995 | 02 |
| IE641, IE642 | F | Bordeaux, France | cervix, endometrium | 28/06/1996 | 13 |
| **IE874** (SE14705),  **IE875** (SE14706) | F | Bordeaux, France | peritoneal fluid,  cervix | 30/03/2007 | 19 |
| SE23628, SE23629 | F | Bordeaux, France | cervix, urine | 20/01/2010 | 23 |
| SE23831, SE23832 | F | Bordeaux, France | cervix, urine | 05/02/2010 | 11 |
| SE23965, SE23968 | F | Bordeaux, France | cervix, urine | 12/02/2010 | 11 |
| SE24328, SE24329 | F | Bordeaux, France | cervix, urine | 09/03/2010 | 13 |
| SE24520, SE24521 | F | Bordeaux, France | cervix, urine | 23/03/2010 | 11 |
| SE24550d, SE24551  SE25654 | F | Bordeaux, France | cervix, urine  cervix | 25/03/2010  28/06/2010 | 11 |
| SE24904, SE24905 | M | Bordeaux, France | urine, urethra | 21/04/2010 | 24 |
| SE25417, SE25418 | M | Bordeaux, France | urine, urethra | 04/06/2010 | 13 |
| SE26196, SE26197 | M | Bordeaux, France | urine, urethra | 16/08/2010 | 13 |
| SE23720, SE23721 | F | Bordeaux, France | cervix, urine | 27/01/2010 | 01 |
| ***Group III: sequential urogenital isolates and specimens*** | | | | | |
| IE155, IE191 | F | Bordeaux, France | cervix, cervix | 19/11/1990, 07/04/1991 | 13 |
| IE205, IE272 | M | Bordeaux, France | urethra, urethra | 07/05/1991, 29/04/1992 | 03 |
| IE238, IE239d | F | Bordeaux, France | cervix, cervix | 15/11/1991, 13/12/1991 | 13 |
| IE279, IE336 | F | Bordeaux, France | cervix, cervix | 02/06/1992, 15/12/1992 | 01 |
| IE325, IE527 | F | Bordeaux, France | cervix, cervix | 01/08/1992, 23/12/1994 | 02 |
| **IE344**, **IE488** | F | Bordeaux, France | cervix, cervix | 08/10/1992, 28/03/1994 | 11 |
| **IE357d**,  **IE600** | F | Bordeaux, France | cervix,  cervix | 28/12/1992,  03/12/1995 | 02  13 |
| IE792, IE800 | F | Bordeaux, France | cervix, cervix | 11/06/2004, 31/08/2004 | 11 |
| **IE863** (SE13681),  **IE918** (SE17268) | F | Bordeaux, France | cervix,  cervix | 04/12/2006,  12/02/2008 | 02 |
| IE909, IE913(SE17097) | F | Bordeaux, France | cervix, cervix | 03/01/2008, 24/01/2008 | 13 |
| IE983, I**E986** (SE21582) | F | Bordeaux, France | cervix, cervix | 18/06/2009, 25/06/2009 | 12 |
| SE24550d, SE25654 | F | Bordeaux, France | cervix, cervix | 25/03/2010, 28/06/2010 | 11 |
| ***Group IV: urogenital positive specimens before and after treatment*** | | | | | |
| SE14758, SE15218 | F | Bordeaux, France | cervix, cervix | 04/04/2007, 01/06/2007 | 11 |
| SE24132, SE24848 | M | Bordeaux, France | urine, urine | 25/02/2010, 15/04/210 | 13 |
| SE24326, SE25165 | F | Bordeaux, France | cervix, cervix | 09/03/2010, 17/05/2010 | 02 |
| SE26549, SE18350 | F | Bordeaux, France | cervix, cervix | 10/09/2010, 09/11/2010 | 13 |
| SE18933, SE23785 | F | Bordeaux, France | cervix, cervix | 17/11/2010, 17/01/2011 | 25 |
| ***Group V: Swedish nvCT isolate and specimens*** | | | | | |
| IE871 | F | Bordeaux, France | cervix | 26/01/2007 | 14 |
| SE734 | M | Sweden | urine | 02/02/2009 | 14 |
| SE741 | M | Sweden | urine | 02/02/2009 | 14 |
| SE809 | M | Sweden | urine | 03/02/2009 | 14 |
| SE851 | F | Sweden | urine + cervix | 04/02/2009 | 14 |
| SE855 | F | Sweden | urine + cervix | 05/02/2009 | 14 |
| SE905 | F | Sweden | urine + cervix | 04/02/2009 | 14 |
| SE967 | F | Sweden | urine + cervix | 09/02/2009 | 14 |
| SE993 | M | Sweden | urine | 11/02/2009 | 14 |
| SE1010 | F | Sweden | urine + cervix | 12/02/2009 | 14 |
| SE1030 | F | Sweden | urine + cervix | 12/02/2009 | 14 |
| SE1221 | M | Sweden | urine | 30/01/2009 | 14 |
| SE1560 | M | Sweden | urine | 06/02/2009 | 14 |
| SE1664 | M | Sweden | urine | 09/02/2009 | 14 |
| SE1803 | M | Sweden | urine | 11/02/2009 | 14 |
| SE1965 | M | Sweden | urine | 16/02/2009 | 14 |
| SE2115 | M | Sweden | urine | 18/02/2009 | 14 |
| SE2667 | M | Sweden | urine | 02/03/2009 | 14 |
| SE2776 | M | Sweden | urine | 04/03/2009 | 14 |
| SE2978 | M | Sweden | urine | 10/03/2009 | 14 |
| SE3143 | M | Sweden | urine | 12/03/2009 | 14 |
| ***Group VI : anorectal isolates ans specimens*** | | | | | |
| **IECV54** | M | Paris, France | anus/rectum | 01/06/2005 | 21 |
| **IECV319** | M | Paris, France | anus/rectum | 06/01/2008 | 21 |
| **IECV329** | M | Paris, France | anus/rectum | 15/03/2008 | 21 |
| **IESL52** | M | Paris, France | anus/rectum | 17/08/2005 | 21 |
| **IESL71** | M | Paris, France | anus/rectum | 19/06/2006 | 21 |
| **IESL140** | M | Paris, France | anus/rectum | 20/12/2007 | 21 |
| SE26266 | M | Paris, France | anus/rectum | 19/08/2010 | 21 |
| SE26512 | M | Paris, France | anus/rectum | 10/09/2010 | 21 |
| SE26734 | M | Paris, France | anus/rectum | 28/09/2010 | 13 |
| SE26561 | M | Bordeaux, France | anus/rectum | 14/09/2010 | 21 |
| SE26838 | F | Bordeaux, France | anus/rectum | 05/10/2010 | 13 |
