# Supplementary material for: MLVA Subtyping of Genovar E Chlamydia trachomatis Individualizes the Swedish Variant and Anorectal Isolates from Men who Have Sex with Men
Source: PLoS One. 2012 Feb 21;7(2):e31538. doi: 10.1371/journal.pone.0031538 (PMC3283677; doi:10.1371/journal.pone.0031538)
Supplement: Table S2 — Characteristics of the 85 non-E genovar C. trachomatis -positive specimens and C. trachomatis reference strains. aReference strains and positive specimens are preceded by the letters I and S, respectively. (DOC) [file pone.0031538.s002.doc]

Table S2.

| **Reference strain**  **or specimen**a | **Sexe** | **Origin** | | **Date of isolation** | **Genovar** | **MLVA-5 type** |
| --- | --- | --- | --- | --- | --- | --- |
| **City, Country** | **Source** |
| IDref UW-3/Cx |  |  |  |  | D | 27 |
| SD524 | F | Bordeaux, France | cervix | 03/11/1994 | D | 26 |
| SD530 | F | Bordeaux, France | cervix | 03/11/1994 | D | 09 |
| SD612 | F | Bordeaux, France | cervix | 01/03/1996 | D | 32 |
| SD619 | F | Bordeaux, France | cervix | 01/04/1996 | D | 27 |
| SD20576 | F | Bordeaux, France | cervix | 02/02/2009 | D | 08 |
| IDaref TW-448/Cx |  |  |  |  | Da | 17 |
| SDa761 | M | Bordeaux, France | urethra | 09/04/2002 | Da | 08 |
| SDa8769 | F | Bordeaux, France | cervix | 14/03/2003 | Da | 09 |
| SDa11033 | F | Bordeaux, France | cervix | 20/03/2005 | Da | 09 |
| SDa11389 | M | Bordeaux, France | urethra | 17/05/2005 | Da | 31 |
| SDa11689 | M | Bordeaux, France | urethra | 18/05/2005 | Da | 09 |
| SDa12592 | M | Bordeaux, France | anus/rectum | 28/06/2006 | Da | 09 |
| SDa17909 | F | Bordeaux, France | cervix | 02/05/2008 | Da | 17 |
| SDa18913 | M | Bordeaux, France | urethra | 23/09/2008 | Da | 32 |
| SDaK10 | M | Paris, France | anus/rectum | 02/08/2004 | Da | 08 |
| SDaCV450 | M | Paris, France | anus/rectum | 01/07/2008 | Da | 09 |
| SDaBX1 | M | Bordeaux, France | anus/rectum | 18/02/2010 | Da | 26 |
| SDaF503 | M | Paris, France | anus/rectum | 15/03/2010 | Da | 26 |
| SDaF513 | M | Paris, France | anus/rectum | 10/05/2010 | Da | 26 |
| SDaCB16 | M | Paris, France | anus/rectum | 01/06/2010 | Da | 27 |
| SDaTG12 | M | Tourcoing, France | anus/rectum | 11/06/2010 | Da | 26 |
| SDaCB20 | M | Paris, France | anus /rectum | 28/06/2010 | Da | 09 |
| SDaF521 | M | Paris, France | anus /rectum | 30/07/2010 | Da | 26 |
| SDaCV597 | M | Paris, France | anus /rectum | 07/08/2010 | Da | 28 |
| SDaSL234 | M | Paris, France | anus /rectum | 17/08/2010 | Da | 28 |
| SDaLYO2 | M | Lyon, France | anus /rectum | 29/09/2010 | Da | 28 |
| SDaCV628 | M | Paris, France | anus /rectum | 27/10/2010 | Da | 29 |
| IFref Ic-Cal-3 |  |  |  |  | F | 09 |
| SF23787 | F | Bordeaux, France | urine | 01/07/2010 | F | 08 |
| SF24476 | F | Bordeaux, France | cervix | 19/03/2010 | F | 09 |
| SF24692 | F | Bordeaux, France | urine | 01/04/2010 | F | 17 |
| SF26122 | F | Bordeaux, France | cervix | 10/08/2010 | F | 08 |
| SF26844 | F | Bordeaux, France | cervix | 06/10/2010 | F | 38 |
| SF18611 | F | Bordeaux, France | cervix | 12/11/2010 | F | 09 |
| SF23512 | M | Paris, France | anus/rectum | 06/01/2010 | F | 11 |
| SFCV648 | M | Paris, France | anus/rectum | 20/12/2010 | F | 11 |
| IGref UW-57/Cx |  |  |  |  | G | 27 |
| SG23457 | F | Bordeaux, France | cervix | 07/01/2010 | G | 32 |
| SG24816 | F | Bordeaux, France | cervix | 14/04/2010 | G | 32 |
| SG25258 | F | Bordeaux, France | cervix | 21/05/2010 | G | 32 |
| SG26301 | F | Bordeaux, France | cervix | 24/08/2010 | G | 32 |
| SG26745 | M | Bordeaux, France | urine | 28/09/2010 | G | 11 |
| SG22203 | F | Bordeaux, France | cervix | 29/12/2010 | G | 09 |
| SGF495 | M | Paris, France | anus/rectum | 08/01/2010 | G | 36 |
| SGCV607 | M | Paris, France | anus/rectum | 16/09/2010 | G | 26 |
| SG4711 | M | Monptellier, France | anus/rectum | 01/10/2010 | G | 26 |
| SGCV633 | M | Paris, France | anus/rectum | 11/11/2010 | G | 09 |
| SGCV639 | M | Paris, France | anus/rectum | 30/11/2010 | G | 37 |
| SG23514 | M | Paris, France | anus/rectum | 07/01/2010 | G | 26 |
| SG23903 | M | Tourcoing, France | anus/rectum | 09/02/2010 | G | 36 |
| SG26462 | M | Bordeaux, France | anus/rectum | 06/09/2010 | G | 26 |
| SG19250 | F | Bordeaux, France | cervix | 02/11/2008 | G | 08 |
| SG17356 | F | Bordeaux, France | cervix | 21/02/2008 | G | 11 |
| SGCV601 | M | Paris, France | anus/rectum | 28/08/2010 | G | 28 |
| IHref UW-43/Cx |  |  |  |  | H | 27 |
| SH25875 | F | Bordeaux, France | cervix | 19/07/2010 | H | 32 |
| SH20197 | F | Bordeaux, France | cervix | 06/02/2009 | H | 32 |
| SH21447 | F | Bordeaux, France | cervix | 11/06/2009 | H | 17 |
| IIref UW-12/Ur |  |  |  |  | I | 32 |
| SI25783 | F | Bordeaux, France | cervix | 08/07/2010 | I | 32 |
| SI22200 | F | Bordeaux, France | cervix | 02/09/2009 | I | 32 |
| SI22592 | F | Bordeaux, France | cervix | 09/10/2009 | I | 32 |
| SI22859 | F | Bordeaux, France | cervix | 05/11/2009 | I | 17 |
| SI22890 | F | Bordeaux, France | cervix | 09/11/2009 | I | 32 |
| SI22906 | F | Bordeaux, France | cervix | 09/11/2009 | I | 17 |
| IIaref UW-202/Cx |  |  |  |  | Ia | 17 |
| SIa23549 | M | Bordeaux, France | urine | 14/01/2010 | Ia | 17 |
| SIa24206 | F | Bordeaux, France | cervix | 02/03/2010 | Ia | 27 |
| SIa24870 | F | Bordeaux, France | cervix | 16/04/2010 | Ia | 27 |
| SIa20428 | F | Bordeaux, France | cervix | 03/12/2010 | Ia | 17 |
| SIa26719 | F | Bordeaux, France | cervix | 27/09/2010 | Ia | 17 |
| SIa22142 | F | Bordeaux, France | cervix | 28/08/2009 | Ia | 17 |
| SIa26797 | F | Bordeaux, France | cervix | 01/10/2010 | Ia | 17 |
| IJref UW-36/Cx |  |  |  |  | J | 32 |
| SJ23661 | F | Bordeaux, France | cervix | 22/01/2010 | J | 27 |
| SJ26206 | F | Bordeaux, France | cervix | 17/08/2010 | J | 17 |
| SJ26223 | M | Bordeaux, France | urine | 18/08/2010 | J | 33 |
| SJ26889 | F | Bordeaux, France | cervix | 08/10/2010 | J | 17 |
| SJ16887 | F | Bordeaux, France | cervix | 20/10/2010 | J | 17 |
| SJ21148 | F | Bordeaux, France | cervix | 12/05/2009 | J | 17 |
| SJ21739 | F | Bordeaux, France | cervix | 17/07/2009 | J | 15 |
| SJ22510 | F | Bordeaux, France | cervix | 01/10/2009 | J | 17 |
| SJCV533 | M | Paris, France | anus/rectum | 21/01/2010 | J | 30 |
| SJF505 | M | Paris, France | anus/rectum | 02/04/2010 | J | 30 |
| SJCV609 | M | Paris, France | anus/rectum | 27/09/2010 | J | 30 |
| SJCB37 | M | Paris, France | anus/rectum | 09/11/2010 | J | 31 |
| SJTG23 | M | Tourcoing, France | anus/rectum | 22/12/2010 | J | 34 |
| SJCV599 | M | Bordeaux, France | anus/rectum | 23/08/2010 | J | 33 |
| SJCV605 | M | Paris, France | anus/rectum | 15/09/2010 | J | 35 |
| IKref UW-31/Cx |  |  |  |  | K | 27 |
| SK23397 | F | Bordeaux, France | cervix | 04/01/2010 | K | 32 |
| Sk25192 | F | Bordeaux, France | cervix | 19/05/2010 | K | 32 |
| SK23515 | M | Bordeaux, France | urine | 12/01/2011 | K | 32 |
| SK23516 | F | Bordeaux, France | cervix | 12/01/2011 | K | 32 |
